# Supplementary material for: Screening and Intervention for Suicide Prevention: A Cost-Effectiveness Analysis of the ED-SAFE Interventions
Source: Atypon-hosted journal article supplement (doi:10.1176/appi.ps.201800445), 2019-08-27
Supplement: appi.ps.201800445.ds001.pdf [file appi.ps.201800445.ds001.pdf]

**Online Supplement**

## Appendix 1: Outcome Summary Table

| Outcome Measure                                                 | Description/Calculation                                                                                                                                                                                                                                                                | Source                 |
|-----------------------------------------------------------------|----------------------------------------------------------------------------------------------------------------------------------------------------------------------------------------------------------------------------------------------------------------------------------------|------------------------|
| Percentage of ED patients screened for suicidality              | The percentage of ED patients screened was calculated by dividing the number of screened patients at the ED site by the total number of patients entering the ED site during the relevant intervention phase and then multiplying by 100 to convert to a percentage.                   | Boudreaux et al., 2016 |
| Percentage of ED patients who screened positive for suicidality | The percentage of ED patients screened positive was calculated by dividing the number of screened positive patients at the ED site by the total number of patients entering the ED site during the relevant intervention phase and then multiplying by 100 to convert to a percentage. | Boudreaux et al., 2016 |
| Traditional suicide composite                                   | The traditional suicide composite counts the number of attempted suicides and deaths by suicide over 12 months per person.                                                                                                                                                             | Miller et. al. 2017    |

## Appendix 2: Incremental Cost and Outcome Scatterplots

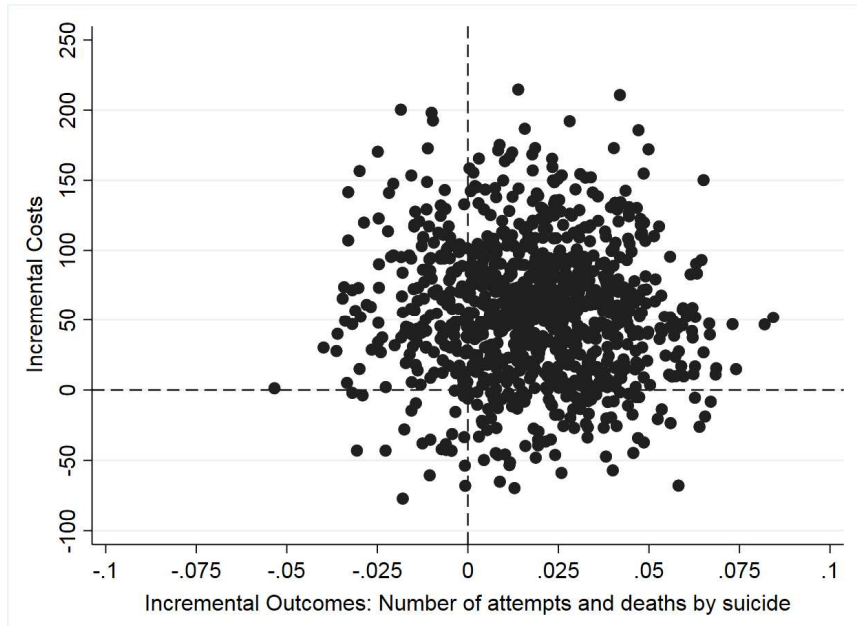

**Treatment as usual compared to Universal screening**

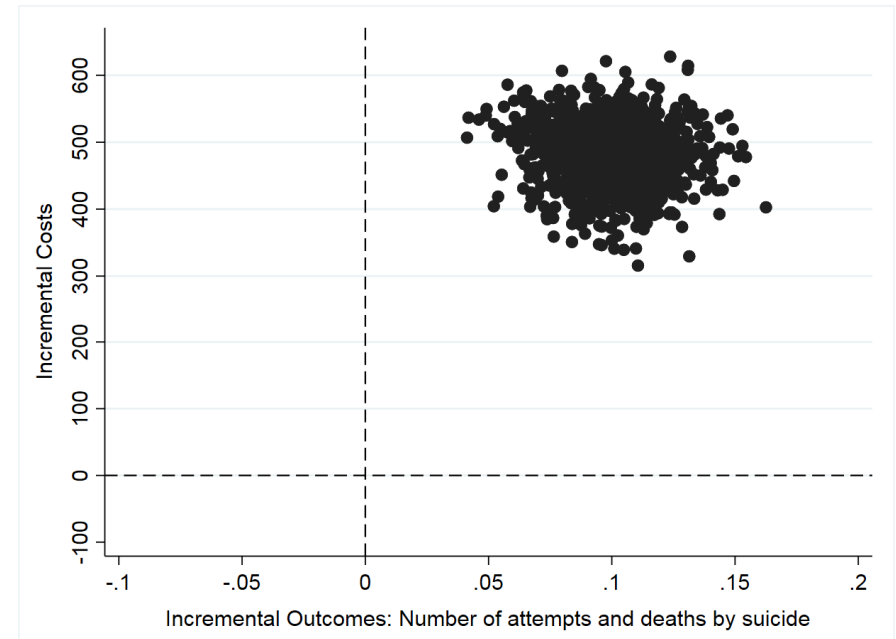

**Universal screening compared to Universal screening + intervention**

The figures show the scatterplots of the bootstrapped incremental cost ( $\Delta C$ ) and outcome ( $-\Delta E$ ) pairs used in calculating the CEAC in Figure 1.
